# Supplementary material for: Does cyanoacrylate have the best postoperative outcomes after third molar extractions when compared to conventional sutures? A systematic review and meta-analysis
Source: PubMed Central journal article supplement — Heliyon. 2023 Nov 29;10(1):e23058. doi: 10.1016/j.heliyon.2023.e23058 (PMC10755274; doi:10.1016/j.heliyon.2023.e23058), 2023-11-29
Supplement: mmc2.pdf [file mmc2.pdf]

**Author(s):**  
**Question:** [Cyanoacrylate compared to [Silk suture] for [Pain, edema and trismus]  
**Setting:**  
**Bibliography:**

| Certainty assessment                                                                                        |                   |                      |                           |              |                             |                      | N <sub>e</sub> of patients |               | Effect            |                                                              | Certainty        | Importance |
|-------------------------------------------------------------------------------------------------------------|-------------------|----------------------|---------------------------|--------------|-----------------------------|----------------------|----------------------------|---------------|-------------------|--------------------------------------------------------------|------------------|------------|
| N <sub>e</sub> of studies                                                                                   | Study design      | Risk of bias         | Inconsistency             | Indirectness | Imprecision                 | Other considerations | [Cyanoacrylate]            | [Silk suture] | Relative (95% CI) | Absolute (95% CI)                                            |                  |            |
| <b>Pain (follow-up: mean 1 days; assessed with: Analogic visual scale)</b>                                  |                   |                      |                           |              |                             |                      |                            |               |                   |                                                              |                  |            |
| 3                                                                                                           | randomised trials | serious <sup>a</sup> | very serious <sup>b</sup> | not serious  | serious <sup>c</sup>        | none                 | 170                        | 170           | -                 | SMD <b>1.034 SD higher</b><br>(1.924 higher to 0.144 higher) | ⊕○○○<br>Very low | CRITICAL   |
| <b>Pain (follow-up: 3 days; assessed with: Analogic visual scale)</b>                                       |                   |                      |                           |              |                             |                      |                            |               |                   |                                                              |                  |            |
| 3                                                                                                           | randomised trials | serious <sup>a</sup> | very serious <sup>b</sup> | not serious  | serious <sup>d</sup>        | none                 | 170                        | 170           | -                 | SMD <b>0.026 SD higher</b><br>(0.62 higher to 569 higher)    | ⊕○○○<br>Very low | CRITICAL   |
| <b>Pain (follow-up: 4 days; assessed with: Analogic visual scale)</b>                                       |                   |                      |                           |              |                             |                      |                            |               |                   |                                                              |                  |            |
| 3                                                                                                           | randomised trials | serious <sup>a</sup> | not serious               | not serious  | serious <sup>d</sup>        | none                 | 170                        | 170           | -                 | SMD <b>0.195 SD higher</b><br>(0.484 higher to 0.095 higher) | ⊕+○○<br>Low      | CRITICAL   |
| <b>Pain (follow-up: 5 days; assessed with: Analogic visual scale)</b>                                       |                   |                      |                           |              |                             |                      |                            |               |                   |                                                              |                  |            |
| 3                                                                                                           | randomised trials | serious <sup>a</sup> | very serious <sup>b</sup> | not serious  | very serious <sup>c,d</sup> | none                 | 170                        | 170           | -                 | SMD <b>0.726 SD higher</b><br>(1.507 higher to 0.056 higher) | ⊕○○○<br>Very low | CRITICAL   |
| <b>Edema (follow-up: 1 days; assessed with: volumetric analysis of the average per traces on the face)</b>  |                   |                      |                           |              |                             |                      |                            |               |                   |                                                              |                  |            |
| 3                                                                                                           | randomised trials | not serious          | not serious               | not serious  | serious <sup>c</sup>        | none                 | 190                        | 190           | -                 | SMD <b>0.286 SD higher</b><br>(0.541 higher to 0.031 higher) | ⊕+⊕○<br>Moderate | CRITICAL   |
| <b>Edema (follow-up: 2 days; assessed with: volumetric analysis of the average per traces on the face)</b>  |                   |                      |                           |              |                             |                      |                            |               |                   |                                                              |                  |            |
| 2                                                                                                           | randomised trials | not serious          | not serious               | not serious  | serious <sup>d</sup>        | none                 | 70                         | 70            | -                 | SMD <b>0.253 SD higher</b><br>(0.565 higher to 0.058 higher) | ⊕+⊕○<br>Moderate | CRITICAL   |
| <b>Edema (follow-up: 3 days; assessed with: volumetric analysis of the average per traces on the face)</b>  |                   |                      |                           |              |                             |                      |                            |               |                   |                                                              |                  |            |
| 2                                                                                                           | randomised trials | not serious          | not serious               | not serious  | serious <sup>d</sup>        | none                 | 140                        | 140           | -                 | SMD <b>0.126 SD higher</b><br>(0.458 higher to 0.206 higher) | ⊕+⊕○<br>Moderate | CRITICAL   |
| <b>Edema (follow-up: 1 weeks; assessed with: volumetric analysis of the average per traces on the face)</b> |                   |                      |                           |              |                             |                      |                            |               |                   |                                                              |                  |            |
| 4                                                                                                           | randomised trials | not serious          | not serious               | not serious  | serious <sup>d</sup>        | none                 | 210                        | 210           | -                 | SMD <b>0.239 SD higher</b><br>(0.466 higher to 0.011 higher) | ⊕+⊕○<br>Moderate | CRITICAL   |
| <b>Trismus (follow-up: 1 days; assessed with: Assessment by Interincisal distance)</b>                      |                   |                      |                           |              |                             |                      |                            |               |                   |                                                              |                  |            |
| 2                                                                                                           | randomised trials | not serious          | very serious <sup>b</sup> | not serious  | very serious <sup>c,d</sup> | none                 | 140                        | 140           | -                 | SMD <b>0.592 SD higher</b><br>(1.002 higher to 2.187 higher) | ⊕○○○<br>Very low | CRITICAL   |
| <b>Trismus (follow-up: 2 days; assessed with: Assessment by Interincisal distance)</b>                      |                   |                      |                           |              |                             |                      |                            |               |                   |                                                              |                  |            |

|   |                   |             |                           |             |                             |      |     |     |   |                                                              |                  |          |
|---|-------------------|-------------|---------------------------|-------------|-----------------------------|------|-----|-----|---|--------------------------------------------------------------|------------------|----------|
| 2 | randomised trials | not serious | very serious <sup>b</sup> | not serious | very serious <sup>c,d</sup> | none | 140 | 140 | - | SMD <b>0.716 SD higher</b><br>(1.182 higher to 2.615 higher) | ⊕○○○<br>Very low | CRITICAL |
|---|-------------------|-------------|---------------------------|-------------|-----------------------------|------|-----|-----|---|--------------------------------------------------------------|------------------|----------|

**Trismus (follow-up: 1 weeks; assessed with: Assessment by Interincisal distance)**

|   |                   |             |                           |             |                             |      |     |     |   |                                                              |                  |          |
|---|-------------------|-------------|---------------------------|-------------|-----------------------------|------|-----|-----|---|--------------------------------------------------------------|------------------|----------|
| 3 | randomised trials | not serious | very serious <sup>b</sup> | not serious | very serious <sup>c,d</sup> | none | 160 | 160 | - | SMD <b>0.286 SD higher</b><br>(0.676 higher to 1.248 higher) | ⊕○○○<br>Very low | CRITICAL |
|---|-------------------|-------------|---------------------------|-------------|-----------------------------|------|-----|-----|---|--------------------------------------------------------------|------------------|----------|

CI: confidence interval; SMD: standardised mean difference

**Explanations**

- a. High risk of bias was found for important criteria in this study design.
- b. Considerable heterogeneity (>75%) significant statistically was found.
- c. Wide confidence interval between effect estimates
- d. Their confidence ranges include values that favor either of the compared treatments.
